# Supplementary material for: Pan-phosphatidylinositol 3-kinase inhibition with buparlisib in patients with relapsed or refractory non-Hodgkin lymphoma
Source: PubMed Central journal article supplement — Haematologica. 2017 Sep 29;102(12):2104–12. doi: 10.3324/haematol.2017.169656 (PMC5709110; doi:10.3324/haematol.2017.169656), 2017-12
Supplement: 2017.169656.YOUNES_SUPPL.pdf [file 2017.169656.YOUNES_SUPPL.pdf]

## Pan-phosphatidylinositol 3-kinase inhibition with buparlisib in patients with relapsed or refractory non-Hodgkin lymphoma

Anas Younes,<sup>1</sup> Gilles Salles,<sup>2</sup> Giovanni Martinelli,<sup>3</sup> Robert Gregory Bociek,<sup>4</sup> Dolores Caballero Barrigon,<sup>5</sup> Eva González Barca,<sup>6</sup> Mehmet Turgut,<sup>7</sup> John Gerecitano,<sup>1</sup> Oliver Kong,<sup>8</sup> Chaitali Babanrao Pisal,<sup>9</sup> Ranjana Tavorath<sup>8</sup> and Won Seog Kim<sup>10</sup>

<sup>1</sup>Memorial Sloan Kettering Cancer Center, New York, NY, USA; Weill Cornell Medical College, Cornell University, New York, NY, USA; <sup>2</sup>Centre Hospitalier Lyon-Sud, Pierre Bénite, Lyon, France; <sup>3</sup>European Institute of Oncology, Milan, Italy; <sup>4</sup>University of Nebraska Medical Center, Omaha, NE, USA; <sup>5</sup>Hospital Universitario de Salamanca, Spain; <sup>6</sup>Hospital Duran i Reynals-ICO, Barcelona, Spain; <sup>7</sup>Ondokuz Mayıs University, Samsun, Turkey; <sup>8</sup>Novartis Pharmaceuticals Corporation, East Hanover, NJ, USA; <sup>9</sup>Novartis Healthcare Pvt. Ltd., Hyderabad, India and <sup>10</sup>Samsung Medical Center, Sungkyunkwan University School of Medicine, Seoul, South Korea

©2017 Ferrata Storti Foundation. This is an open-access paper. doi:10.3324/haematol.2017.169656

Received: April 14, 2017.

Accepted: September 20, 2017.

Pre-published: September 29, 2017.

Correspondence: younesa@mskcc.org or wskimsmc@skku.edu

---

## **Supplementary methods:**

### **Patients:**

Concomitant use of moderate and strong cytochrome P4503A inhibitors and inducers was not allowed. Additional exclusion criteria were grade  $\geq 3$  anxiety, active or documented history of major depressive episode, bipolar disorder, obsessive-compulsive disorder, schizophrenia, suicidal attempt or ideation, homicidal ideation, or severe personality disorders. Patients who had moderate to severe depression (Patient Health Questionnaire-9 [PHQ-9] score  $\geq 12$ ), moderate to severe anxiety (General Anxiety Disorder-7 mood questionnaire [GAD-7] score  $\geq 15$ ), or potential for suicidal thoughts or ideations (positive response to question 9 in the PHQ-9) were also excluded.

### **Objectives:**

PFS was defined as the time from treatment start to the date of first documented progressive disease (PD) or death from any cause per local investigator assessment. DOR was defined as the time from first achieving CR or PR, among the responders, to the first documented PD or death due to lymphoma. OS was defined as the time from treatment start to death from any cause.

In addition, the disease control rate, defined as the proportion of patients with best overall response of CR or PR or stable disease, and the time-to-response (TTR), defined as the time from the date of start of treatment to the date of first documented response, were also calculated for each cohort. Exploratory objectives included identifying molecular profiles relevant to PI3K signaling (e.g., mutation, loss, and/or amplification of *PI3K*, *PTEN*, and *KRAS*).

### **Schedule of assessments (Described in the Online Supplementary methods):**

Fasting plasma glucose, ECOG performance status, and electrocardiogram were assessed on Day 1 of each cycle and at the end of treatment. Cardiac imaging (i.e., multigated acquisition scan or echocardiogram) and coagulation studies were performed at screening and as clinically indicated. Tumor assessment was performed according to IWG criteria<sup>1,2</sup> every 8 weeks until disease progression or until 6 months after the last patient in the cohort had started the study treatment, whichever came first. In

addition, lipid profile, HbA1c and C-peptide were evaluated every 8 weeks, beginning on Day 1, Cycle 1, and at the end of treatment. Tumor evaluation was performed using computed tomography scans, or magnetic resonance imaging scans if computed tomography was not available. In the DLBCL cohort, chemistry specific to tumor lysis syndrome was performed on Days 2-4 of Cycle 1.

Bone marrow biopsy was performed only to confirm disease status in patients with radiographic CR.

Archival tumor samples (blocks or slides) were collected at screening. Optional fresh tumor samples from biopsy or resection were taken at screening, Day 1 of Cycle 3, and at the end of treatment. The activation status of molecules involved in PI3K signaling (i.e., PI3K, AKT, KRAS, PTEN) was assessed in available tumor samples. *PI3KCA* and *PTEN* mutation analysis were evaluated by Sanger sequencing in 41 and 42 tumor samples, respectively. *PTEN* loss of expression was evaluated by immunohistochemistry using a rabbit monoclonal antibody (#9559; Cell Signaling Technology, Danvers, MA) in 50 tumor samples.

Patient-reported questionnaires (PHQ-9<sup>3</sup> and GAD-7<sup>4</sup> patient self-rating mood scales) were completed at the beginning of each cycle and at the end of treatment. Safety was evaluated continuously throughout the study period using the Common Terminology for Adverse Events (CTCAE), version 4.03.

### **Statistical analyses:**

The sample size of  $\geq 22$  patients in each cohort was determined so that a true ORR of 35% could be detected with a probability of  $\geq 80\%$  (e.g., power of 83.7% for 22 patients); maximum enrollment was capped at 28 patients. A significant result would require  $\geq 6$  responses (for 22-23 patients) or  $\geq 7$  responses (for 24-28 patients, in case of over-enrollment); for example, a minimal observed ORR of 27.3%, corresponding to 6 responses, would be required for a cohort of 22 patients. Enrollment of  $\geq 22$  patients in a cohort would result in different rejection criteria and power; for example, if  $n = 24$ , an observed ORR of 29.2% would have a power of 78.9%, and if  $n = 26$ , an observed ORR of 26.9% would have a power of 85.8%.

## Supplementary Tables

**Supplemental Table 1. Dose reduction and/or interruption by cohort**

|                                                            | <b>DLBCL<br/>(n = 26)</b> | <b>MCL<br/>(n = 22)</b> | <b>FL<br/>(n = 24)</b> | <b>All<br/>patients<br/>(N = 72)</b> |
|------------------------------------------------------------|---------------------------|-------------------------|------------------------|--------------------------------------|
| <b>Baseline characteristics</b>                            |                           |                         |                        |                                      |
| Number of patients with dose reductions, n (%)             | 7 (26.9)                  | 7 (31.8)                | 8 (33.3)               | 22 (30.6)                            |
| Percent number of days received full dose, median (range)* | 100<br>(14.3-100)         | 100<br>(6.6-100)        | 97.4<br>(4.2-100)      | 99.1<br>(4.2-100)                    |
| Patients requiring dose reduction, n (%)                   |                           |                         |                        |                                      |
| 0                                                          | 19 (73.1)                 | 15 (68.2)               | 16 (66.7)              | 50 (69.4)                            |
| 1                                                          | 4 (15.4)                  | 2 (9.1)                 | 6 (25.0)               | 12 (16.7)                            |
| 2                                                          | 3 (11.5)                  | 5 (22.7)                | 1 (4.2)                | 9 (12.5)                             |
| ≥3                                                         | 0                         | 0                       | 1 (4.2)                | 1 (1.4)                              |
| Reasons for dose reduction, n (%)                          |                           |                         |                        |                                      |
| Adverse event                                              | 7 (26.9)                  | 7 (31.8)                | 8 (33.3)               | 22 (30.6)                            |
| Dosing error                                               | 0                         | 0                       | 1 (4.2)                | 1 (1.4)                              |
| Patients requiring dose interruption, n (%)                |                           |                         |                        |                                      |
| 0                                                          | 15 (57.7)                 | 12 (54.5)               | 9 (37.5)               | 36 (50.0)                            |
| 1                                                          | 6 (23.1)                  | 3 (13.6)                | 11 (45.8)              | 20 (27.8)                            |
| 2                                                          | 4 (15.4)                  | 3 (13.6)                | 3 (12.5)               | 10 (13.9)                            |
| ≥3                                                         | 1 (3.8)                   | 4 (18.2)                | 1 (4.2)                | 6 (8.3)                              |
| Reasons for dose interruption, n (%)                       |                           |                         |                        |                                      |
| Adverse event                                              | 11 (42.3)                 | 9 (40.9)                | 12 (50.0)              | 32 (44.4)                            |
| Scheduling conflict                                        | 0                         | 2 (9.1)                 | 3 (12.5)               | 5 (6.9)                              |
| Dosing error                                               | 0                         | 1 (4.5)                 | 3 (12.5)               | 4 (5.6)                              |

DLBCL, diffuse large B-cell lymphoma; FL, follicular lymphoma; MCL, mantle cell lymphoma.

\*Denominator is the number of potential days dosed; full dose is 100 mg of buparlisib.

**Supplemental Table 2. PI3K pathway activation status by cohort at screening**

| <b>PI3K pathway aberration, n (%)</b>             | <b>DLBCL<br/>(n = 26)</b> | <b>MCL<br/>(n = 22)</b> | <b>FL<br/>(n = 24)</b> |
|---------------------------------------------------|---------------------------|-------------------------|------------------------|
| <b><i>PI3KCA</i> mutation</b>                     |                           |                         |                        |
| Wild-type                                         | 17 (65.4)                 | 11 (50.0)               | 13 (54.2)              |
| Mutant                                            | 0                         | 0                       | 0                      |
| Unknown                                           | 2 (7.7)                   | 0                       | 5 (20.8)               |
| Missing*                                          | 7 (26.9)                  | 11 (50.0)               | 6 (25.0)               |
| <b><i>PTEN</i> mutations</b>                      |                           |                         |                        |
| Wild-type                                         | 18 (69.2)                 | 11 (50.0)               | 13 (54.2)              |
| Mutant                                            | 0                         | 0                       | 0                      |
| Unknown                                           | 1 (3.8)                   | 0                       | 4 (16.7)               |
| Missing*                                          | 7 (26.9)                  | 11 (50.0)               | 7 (29.2)               |
| <b><i>PTEN</i> loss of expression<sup>†</sup></b> |                           |                         |                        |
| Yes                                               | 0                         | 0                       | 0                      |
| No                                                | 19 (73.1)                 | 11 (50.0)               | 20 (83.3)              |
| Unknown                                           | 1 (3.8)                   | 1 (4.5)                 | 0                      |
| Missing*                                          | 6 (23.1)                  | 10 (45.5)               | 4 (16.7)               |

DLBCL, diffuse large B-cell lymphoma; FL, follicular lymphoma; MCL, mantle cell lymphoma.

\*Missing category includes patients without tumor available to identify activation status.

<sup>†</sup>*PTEN* negative: <10% protein expression by immunohistochemistry.

**Supplemental Table 3. Most frequently reported adverse events and laboratory abnormalities regardless of study drug relationship**

|                                                                       | Most common adverse events, n (%) |              |                 |              |                |              |                          |              |
|-----------------------------------------------------------------------|-----------------------------------|--------------|-----------------|--------------|----------------|--------------|--------------------------|--------------|
|                                                                       | DLBCL<br>(n = 26)                 |              | MCL<br>(n = 22) |              | FL<br>(n = 24) |              | All patients<br>(N = 72) |              |
|                                                                       | All<br>grades                     | Grade<br>3/4 | All<br>grades   | Grade<br>3/4 | All<br>grades  | Grade<br>3/4 | All<br>grades            | Grade<br>3/4 |
| <b>Any-cause adverse events (occurring in &gt;5% of all patients)</b> |                                   |              |                 |              |                |              |                          |              |
| Fatigue                                                               | 6 (23.1)                          | 0            | 7 (31.8)        | 1 (4.5)      | 13 (54.2)      | 2 (8.3)      | 26 (36.1)                | 3 (4.2)      |
| Hyperglycemia                                                         | 10 (38.5)                         | 6 (23.1)     | 10 (45.5)       | 1 (4.5)      | 6 (25.0)       | 1 (4.2)      | 26 (36.1)                | 8 (11.1)     |
| Nausea                                                                | 10 (38.5)                         | 2 (7.7)      | 6 (27.3)        | 0            | 10 (41.7)      | 1 (4.2)      | 26 (36.1)                | 3 (4.2)      |
| Depression                                                            | 8 (30.8)                          | 2 (7.7)      | 7 (31.8)        | 0            | 6 (25.0)       | 0            | 21 (29.2)                | 2 (2.8)      |
| Diarrhea                                                              | 5 (19.2)                          | 0            | 6 (27.3)        | 0            | 9 (37.5)       | 0            | 20 (27.8)                | 0            |
| Anxiety                                                               | 6 (23.1)                          | 2 (7.7)      | 7 (31.8)        | 1 (4.5)      | 5 (20.8)       | 0            | 18 (25.0)                | 3 (4.2)      |
| Decreased appetite                                                    | 2 (7.7)                           | 0            | 6 (27.3)        | 1 (4.5)      | 6 (25.0)       | 0            | 14 (19.4)                | 1 (1.4)      |
| Weight decreased                                                      | 3 (11.5)                          | 0            | 7 (31.8)        | 0            | 3 (12.5)       | 0            | 13 (18.1)                | 0            |
| Asthenia                                                              | 3 (11.5)                          | 0            | 5 (22.7)        | 2 (9.1)      | 3 (12.5)       | 1 (4.2)      | 11 (15.3)                | 3 (4.2)      |
| Constipation                                                          | 3 (11.5)                          | 0            | 5 (22.7)        | 0            | 3 (12.5)       | 0            | 11 (15.3)                | 0            |
| Cough                                                                 | 2 (7.7)                           | 0            | 4 (18.2)        | 0            | 4 (16.7)       | 0            | 10 (13.9)                | 0            |
| Abdominal pain                                                        | 4 (15.4)                          | 0            | 3 (13.6)        | 0            | 1 (4.2)        | 1 (4.2)      | 8 (11.1)                 | 1 (1.4)      |
| Pruritus                                                              | 2 (7.7)                           | 0            | 3 (13.6)        | 0            | 3 (12.5)       | 0            | 8 (11.1)                 | 0            |
| Rash                                                                  | 2 (7.7)                           | 0            | 3 (13.6)        | 1 (4.5)      | 3 (12.5)       | 0            | 8 (11.1)                 | 1 (1.4)      |
| Vomiting                                                              | 5 (19.2)                          | 0            | 0               | 0            | 3 (12.5)       | 0            | 8 (11.1)                 | 0            |
| Dyspepsia                                                             | 2 (7.7)                           | 0            | 1 (4.5)         | 0            | 4 (16.7)       | 1 (4.2)      | 7 (9.7)                  | 1 (1.4)      |
| Dyspnea                                                               | 3 (11.5)                          | 1 (3.8)      | 2 (9.1)         | 0            | 2 (8.3)        | 1 (4.2)      | 7 (9.7)                  | 2 (2.8)      |
| Tremor                                                                | 1 (3.8)                           | 0            | 4 (18.2)        | 1 (4.5)      | 2 (8.3)        | 0            | 7 (9.7)                  | 1 (1.4)      |
| Headache                                                              | 0                                 | 0            | 1 (4.5)         | 0            | 5 (20.8)       | 1 (4.2)      | 6 (8.3)                  | 1 (1.4)      |
| Pyrexia                                                               | 3 (11.5)                          | 0            | 2 (9.1)         | 0            | 1 (4.2)        | 0            | 6 (8.3)                  | 0            |
| Urinary tract infection                                               | 2 (7.7)                           | 2 (7.7)      | 1 (4.5)         | 0            | 3 (12.5)       | 0            | 6 (8.3)                  | 2 (2.8)      |
| Agitation                                                             | 1 (3.8)                           | 0            | 3 (13.6)        | 0            | 1 (4.2)        | 0            | 5 (6.9)                  | 0            |
| Anemia                                                                | 1 (3.8)                           | 1 (3.8)      | 2 (9.1)         | 1 (4.5)      | 2 (8.3)        | 0            | 5 (6.9)                  | 2 (2.8)      |
| Back pain                                                             | 0                                 | 0            | 2 (9.1)         | 0            | 3 (12.5)       | 0            | 5 (6.9)                  | 0            |
| Confusional state                                                     | 1 (3.8)                           | 0            | 3 (13.6)        | 2 (9.1)      | 1 (4.2)        | 1 (4.2)      | 5 (6.9)                  | 3 (4.2)      |

|                                                                         |           |          |           |          |           |          |           |           |
|-------------------------------------------------------------------------|-----------|----------|-----------|----------|-----------|----------|-----------|-----------|
| Insomnia                                                                | 2 (7.7)   | 0        | 2 (9.1)   | 0        | 1 (4.2)   | 0        | 5 (6.9)   | 0         |
| Muscle spasms                                                           | 0         | 0        | 2 (9.1)   | 0        | 3 (12.5)  | 0        | 5 (6.9)   | 0         |
| Thrombocytopenia                                                        | 2 (7.7)   | 1 (3.8)  | 1 (4.5)   | 1 (4.5)  | 2 (8.3)   | 1 (4.2)  | 5 (6.9)   | 3 (4.2)   |
| Vertigo                                                                 | 0         | 0        | 3 (13.6)  | 1 (4.5)  | 2 (8.3)   | 1 (4.2)  | 5 (6.9)   | 2 (2.8)   |
| Dizziness                                                               | 1 (3.8)   | 0        | 1 (4.5)   | 0        | 2 (8.3)   | 0        | 4 (5.6)   | 0         |
| Dry skin                                                                | 0         | 0        | 1 (4.5)   | 0        | 3 (12.5)  | 0        | 4 (5.6)   | 0         |
| Hypokalemia                                                             | 3 (11.5)  | 0        | 0         | 0        | 1 (4.2)   | 1 (4.2)  | 4 (5.6)   | 1 (1.4)   |
| Neutropenia                                                             | 2 (7.7)   | 2 (7.7)  | 1 (4.5)   | 1 (4.5)  | 1 (4.2)   | 1 (4.2)  | 4 (5.6)   | 4 (5.6)   |
| Pain in extremity                                                       | 1 (3.8)   | 0        | 2 (9.1)   | 1 (4.5)  | 1 (4.2)   | 0        | 4 (5.6)   | 1 (1.4)   |
| Pleural effusion                                                        | 0         | 0        | 2 (9.1)   | 0        | 2 (8.3)   | 1 (4.2)  | 4 (5.6)   | 1 (1.4)   |
| <b>Hematologic abnormalities</b>                                        |           |          |           |          |           |          |           |           |
| Anemia                                                                  | 17 (65.4) | 1 (3.8)  | 17 (77.3) | 1 (4.5)  | 9 (37.5)  | 0        | 43 (59.7) | 2 (2.8)   |
| Thrombocytopenia                                                        | 14 (53.8) | 1 (3.8)  | 13 (59.1) | 1 (4.5)  | 9 (37.5)  | 1 (4.2)  | 36 (50.0) | 3 (4.2)   |
| Lymphocytopenia                                                         | 13 (50.0) | 7 (26.9) | 8 (36.4)  | 4 (18.2) | 10 (41.7) | 5 (20.8) | 31 (43.1) | 16 (22.2) |
| Leukopenia                                                              | 13 (50.0) | 3 (11.5) | 5 (22.7)  | 3 (13.6) | 4 (16.7)  | 0        | 22 (30.6) | 6 (8.3)   |
| Neutropenia                                                             | 10 (38.5) | 4 (15.4) | 6 (27.3)  | 4 (18.2) | 3 (12.5)  | 1 (4.2)  | 19 (26.4) | 9 (12.5)  |
| Lymphocytosis                                                           | 4 (15.4)  | 1 (3.8)  | 8 (36.4)  | 2 (9.1)  | 5 (20.8)  | 0        | 17 (23.6) | 3 (4.2)   |
| <b>Biochemical abnormalities (occurring in &gt;10% of all patients)</b> |           |          |           |          |           |          |           |           |
| Hyperglycemia                                                           | 17 (65.4) | 6 (23.1) | 15 (68.2) | 4 (18.2) | 19 (79.2) | 5 (20.8) | 51 (70.8) | 15 (20.8) |
| Increased AST                                                           | 11 (42.3) | 0        | 12 (54.5) | 1 (4.5)  | 8 (33.3)  | 0        | 31 (43.1) | 1 (1.4)   |
| Hypercholesterolemia                                                    | 5 (19.2)  | 0        | 8 (36.4)  | 0        | 15 (62.5) | 0        | 28 (38.9) | 0         |
| Hypertriglyceridemia                                                    | 7 (26.9)  | 0        | 9 (40.9)  | 0        | 12 (50.0) | 0        | 28 (38.9) | 0         |
| Increased AP                                                            | 11 (42.3) | 0        | 7 (31.8)  | 0        | 9 (37.5)  | 0        | 27 (37.5) | 0         |
| Increased GGT                                                           | 14 (53.8) | 3 (11.5) | 6 (27.3)  | 2 (9.1)  | 3 (12.5)  | 1 (4.2)  | 23 (31.9) | 6 (8.3)   |
| Increased creatinine                                                    | 9 (34.6)  | 0        | 6 (27.3)  | 0        | 4 (16.7)  | 0        | 19 (26.4) | 0         |
| Hyponatremia                                                            | 10 (38.5) | 0        | 3 (13.6)  | 1 (4.5)  | 6 (25.0)  | 2 (8.3)  | 19 (26.4) | 3 (4.2)   |
| Hypokalemia                                                             | 11 (42.3) | 1 (3.8)  | 4 (18.2)  | 0        | 3 (12.5)  | 1 (4.2)  | 18 (25.0) | 2 (2.8)   |
| Increased ALT                                                           | 4 (15.4)  | 0        | 9 (40.9)  | 1 (4.5)  | 5 (20.8)  | 0        | 18 (25.0) | 1 (1.4)   |
| Hypophosphatemia                                                        | 7 (26.9)  | 3 (11.5) | 5 (22.7)  | 0        | 4 (16.7)  | 0        | 16 (22.2) | 3 (4.2)   |
| Hypoalbuminemia                                                         | 6 (23.1)  | 0        | 4 (18.2)  | 0        | 4 (16.7)  | 0        | 14 (19.4) | 0         |
| Hyperkalemia                                                            | 4 (15.4)  | 0        | 2 (9.1)   | 0        | 6 (25.0)  | 0        | 12 (16.7) | 0         |
| Uric acid                                                               | 6 (23.1)  | 1 (3.8)  | 3 (13.6)  | 0        | 3 (12.5)  | 0        | 12 (16.7) | 1 (1.4)   |
| Hypernatremia                                                           | 3 (11.5)  | 0        | 3 (13.6)  | 0        | 4 (16.7)  | 0        | 10 (13.9) | 0         |
| Hyperbilirubinemia                                                      | 2 (7.7)   | 0        | 5 (22.7)  | 0        | 3 (12.5)  | 0        | 10 (13.9) | 0         |

|                  |         |   |          |   |          |   |          |   |
|------------------|---------|---|----------|---|----------|---|----------|---|
| Increased lipase | 1 (3.8) | 0 | 5 (22.7) | 0 | 3 (12.5) | 0 | 9 (12.5) | 0 |
|------------------|---------|---|----------|---|----------|---|----------|---|

ALT, alanine aminotransferase; AP, alkaline phosphatase; AST, aspartate aminotransferase; DLBCL, diffuse large B-cell lymphoma; FL, follicular lymphoma; GGT, gamma-glutamyl transferase; MCL, mantle cell lymphoma.



## References

1. Cheson BD, Pfistner B, Juweid ME, et al. Revised response criteria for malignant lymphoma. *J Clin Oncol*. 2007;25(5):579-586.
2. Cheson BD. The International Harmonization Project for response criteria in lymphoma clinical trials. *Hematol Oncol Clin North Am*. 2007;21(5):841-854.
3. Kroenke K, Spitzer RL, Williams JB. The PHQ-9: validity of a brief depression severity measure. *J Gen Intern Med*. 2001;16(9):606-613.
4. Spitzer RL, Kroenke K, Williams JB, Lowe B. A brief measure for assessing generalized anxiety disorder: the GAD-7. *Arch Intern Med*. 2006;166(10):1092-1097.
